# Supplementary material
Source: PubMed Central journal article supplement (PMC1965579)
Supplement: pnas_0701742104_1.pdf [file pnas_0701742104_1.pdf]

# A

AATAAAAGCAAAGATAGGGAGGTAGTAGAAGATTAATGAGCCACAACCTATTGTAGGCATATATTGTTTGGATATTGTTGGCGAAAAGCTCACCGTC  
 ATGGCCATGTACCAAATCGACAAAATTAAGCTACCAAATTCACAAAAACAAGGAGGGGTGGAGAGGGAGAGAAAAGAAGGTGGTCTCTCTCTAGT  
 CTCTAGCCATAGGCAATCAAAAGCACCTTTTTCTCACCCCTATAAAAAGGCCCTCACCAACCCATCGCCTCCTCCGCTCAGAGAGAGCAAATTCCTCAG  
 TAAGCAGAATCAAAGCAGATTAACCCCTATCTACTTCTGGCCCTCTAAGAGTTCTCCACTAAGCAAGCGAAAACAGCCATGCTGCACCACCATTAC  
 CATGGCGAGGTGGCCAGCCTGCACTGCCTCTCACCTCCAAGCCTACCATTAGTTCCCACTACCACAGCAACATGATCACCCATGGCACCCCTCGCCC  
 H G E V A S L H C L S P P S L P F S S H Y H S N M I T M A P S P  
 TTCCACTTCCCAGCAGCTACCTGTGAACCTATCCAGGAATTGCTCCCTGTGGTAGCGGGCAATCGCCCAGCCGGCTCTGGCAGCACAGATGACGCC  
 F H F P A A T C E P I Q E L L P V V A G N R P A G S G S T D D A  
 TACCAGATGGCAGCGGAGGAGCGGAGGGCGGAGGATGATCTCCAACCGGGAGTCGGCACGGCGGTTCGCGCATGCGCAAGCAGCGGCAGCTC  
 Y Q M A A E E E E R R R R R M I S N R E S A R R S R M R K Q R Q L  
 AGCGAGCTGAGGGGGCAGGTTGTCACCTCCGTGACGCCAACCGCCCTCCTTGATGAGCTCAACCAAGCAATGAGGGGCTGCAGTGATGTCCAC  
 S E L R G Q V V H L R D A N R R L L D E L N Q A M R G C S D V H  
 TCGGAGAACGCCCGGCTCAGGAAGGAGAGGGCCGAGCTCCAGACCAAGCTCGAGCACCTCATGCAAGCACAGAAGAATAACACCTCGCCGAGCTCC  
 C E N A R L R K E R A E L Q T K L E H L M Q A Q K N N T S P S S  
 TCACAGCCATGCGAGAATTTGATTACTGAATAATAAATCATTCTTAATTATCTCCTCATTTTAACACTACGAGGATTATTATTAGTATATCAAAAT  
 S Q P C E N I \*  
 AAGACATGTTTTGAGATGCTTCCCTTCGGCTTCTGTTTTTTTTGTTTTATCTTTTATGTACGGGAATATTCTAACTGCCATTATTGACATCTTTTTG  
 TCAAGGTGGCTAAGATAAATATGGATTGAGCCTATTGGCGAGTTGACATTGATTAGTAGCAATAACATATGGATATCGATGAGAAAACAAGAAGC  
 TGCAGCAAAGTATAATAAAGAATTCTTAC

# B

|           |     |                                                                  |
|-----------|-----|------------------------------------------------------------------|
| OsTFX1    | 76  | EEERRRRRMISNRESARRSRMRKQRQQLSELRGQVVHLRDNRRLLDELNQAMRGCSDVHC     |
| HORDEU    | 87  | EEERRRRRMVSNRESARRSRMRKQRQQLSELWARVAHLRGNRRLLDELNRAMRSCGDVRR     |
| Os8bZIP   | 119 | EEERRRRRMVSNRESARRSRMRKQRQQLSELWAQVEHLRGNRRLLDELNRALRGCADVRR     |
| AtbZIP48  | 71  | LDERKQRRMLSNRESARRSRMRKQRHLDELWSQVIRLRNENCLIDKLN RVSETQNCVLK     |
| AtbZIP8   | 44  | DNERKRRR KVS NRESARRSRMRKQRHMEELWSMLVQLINKNKS LVD ELSQARECYEKVIE |
| Os2bZIP   | 71  | NDERKKRRLVSNRESARRSRVRKQRRLDELSSQVSELRDTNQRLLVELNHMISKHARIVR     |
| consensus | 121 | ER RR SNRESARRSR RKQR EL L N L d L                               |
