# Supplementary material
Source: PubMed Central journal article supplement (PMC1965579)
Supplement: pnas_0701742104_4.pdf [file pnas_0701742104_4.pdf]

|                    |              |                   |                 |             |
|--------------------|--------------|-------------------|-----------------|-------------|
| NLS motifs:        |              | ...nls1.....//    | ...nls2.....//  | ...nls3.... |
| WT:                | PthXo6/7 NLS | ...KRAKP.....//   | ...RKRSR.....// | ...RVKR.... |
| NLS <sup>-</sup> : | PthXo6/7M123 | ...AAVDL.....//   | ...AAASG.....// | ...NSAG.... |
| SV40-NLS:          | PthXo6/7SV40 | ...AAVDLKKRKV..// | ...AAASG.....// | ...NSAG.... |
