# Supplementary material
Source: PubMed Central journal article supplement (PMC1965579)

*Arabidopsis*  
*OsTFIIA γ1*  
*Z. mays*  
*OsTFIIA γ5*  
*H. vulgare*  
*T. aestivum*

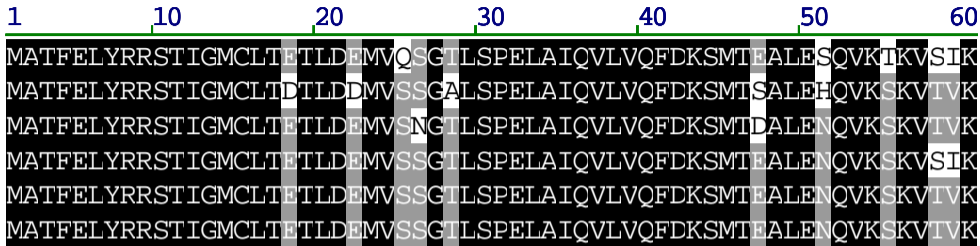

↑ **E in xa5**

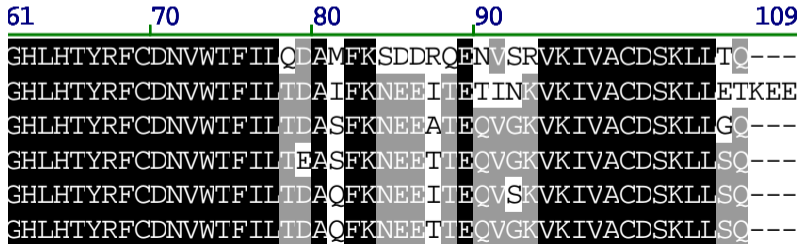

Supplement: pnas_0701742104_2.pdf [file pnas_0701742104_2.pdf]
